# Supplementary material for: Depth-averaged instantaneous currents in a tidally dominated shelf sea from glider observations
Source: Copernicus journal article supplement (doi:10.5194/bg-13-6637-2016), 2016-12-16
Supplement: Supplementary file 1 [file bg-13-6637-2016-supplement.zip]

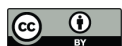

## *Supplement of*

# **Depth-averaged instantaneous currents in a tidally dominated shelf sea from glider observations**

**Lucas Merckelbach**

*Correspondence to:* Lucas Merckelbach ([lucas.merckelbach@hzg.de](mailto:lucas.merckelbach@hzg.de))

- [bg-13-6637-2016-supplement-title-page.pdf](#)
- [ADCP\\_NSB3\\_20140717-20140831.asc](#)

The copyright of individual parts of the supplement might differ from the CC-BY 3.0 licence.
